# Supplementary material for: Self-assembly amphipathic peptides induce active enzyme aggregation that dramatically increases the operational stability of nitrilase
Source: Royal Society of Chemistry journal article supplement (doi:10.1039/c4ra11236a), 2014-01-01
Supplement: c4ra11236a1.pdf [file c4ra11236a1.pdf]

## Supplementary information (ESI)

### **Self-assembly amphipathic peptides induce active enzyme aggregation that dramatically increases the operational stability of nitrilase**

Xiaofeng Yang,<sup>a</sup> An Huang,<sup>a</sup> Jizong Peng,<sup>a</sup> Jufang Wang,<sup>a</sup> Xiaoning Wang,<sup>c</sup> Zhanglin Lin,<sup>\*b</sup> and Shuang Li<sup>\*a</sup>

<sup>a</sup> Guangdong Key Laboratory of Fermentation and Enzyme Engineering, School of Bioscience and Bioengineering, South China University of Technology, Guangzhou Higher Education Mega Center, Panyu District, Guangzhou 510006, China. Tel: +86 (20) 3938 0629; E-mail: [shuangli@scut.edu.cn](mailto:shuangli@scut.edu.cn)

<sup>b</sup> Department of Chemical Engineering, Tsinghua University, One Tsinghua Garden Road, Beijing 100084, China. Tel: +86 (10) 6277 0304; E-mail: [zhanglinlin@mail.tsinghua.edu.cn](mailto:zhanglinlin@mail.tsinghua.edu.cn)

<sup>c</sup> State Key Laboratory of Kidney, the Institute of Life Sciences, Chinese PLA General Hospital, Beijing 100853, China

**Table S1.** Residual nitrilase activity of the purified Nit and Nit-SEA after cross-linked by different reagents.

|         | Glutaraldehyde<br>(4%) | poly-Ethyleneimine<br>(5%) | Dextran polyaldehyde<br>(5%) |
|---------|------------------------|----------------------------|------------------------------|
| Nit     | 0                      | 0                          | 8.2                          |
| Nit-SEA | 0                      | 9.6                        | 29.4                         |

**Table S2** Half-lives of nitrilase of different forms (Unit: hours).

| Temperature | Nit  | Nit-i | Nit-SEA | Nit-iSEA |
|-------------|------|-------|---------|----------|
| 45 °C       | 23.8 | 58.7  | 161.0   | 237.4    |
| 50 °C       | 13.1 | 32.9  | 56.3    | 75.4     |

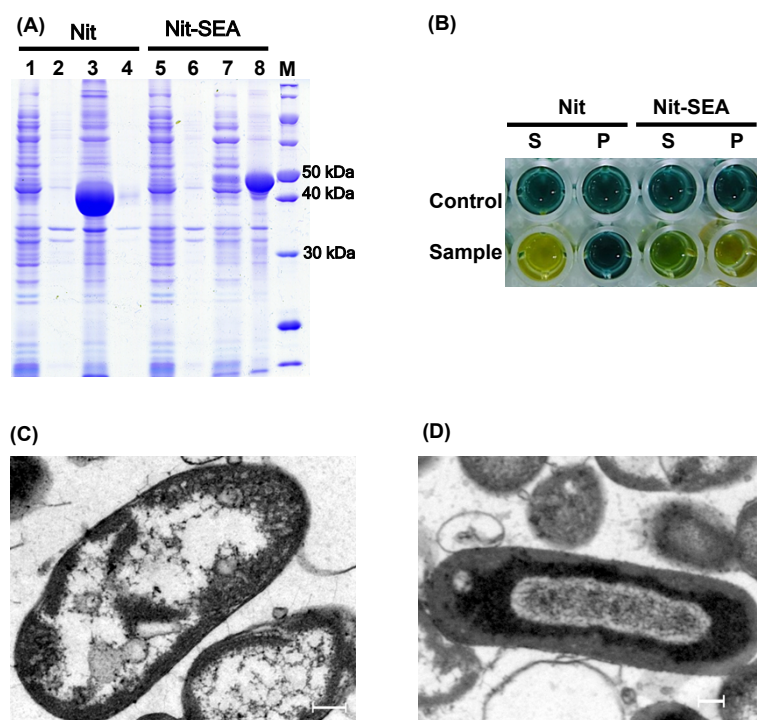

**Figure S1.** Active inclusion bodies formation in *E. coli* BL21(DE3) cells. (A) SDS-PAGE detection of native nitrilase (Nit) and fusion nitrilase (Nit-SEA) expression induced by 0.1 mM IPTG at 22 °C for 20 h. The supernatant of cell lysate of non-induced Nit (lane 1), IPTG induced Nit (lane 3), non-induced Nit-SEA (lane 5) and IPTG induced Nit-SEA (lane 7); and the pellets of cell lysates of non-induced Nit (lane 2), IPTG induced Nit (lane 4), non-induced Nit-SEA (lane 6) and IPTG induced Nit-SEA (lane 8); Lane M, protein molecular weight marker, Fermentas, Cat# 26630. (B) Fluorometric enzyme activity assay of the native nitrilase and the fusion nitrilase-18A using 30 mM mandelonitrile as substrate. S, supernatant fraction; P, precipitation fraction; control, recombinant cells were not induced by IPTG; sample, recombinant cells were induced by 0.1 mM IPTG at 22 °C for 22 h. Colors changed after 3 h incubation of cell lysis with the substrate in 96-well plates at 45 °C. (C) and (D) morphology of the thin-sectioned cells observed under transmission electron microscope (TEM). (C) Native nitrilase; (D) fusion nitrilase. Scale bars: 200 nm.

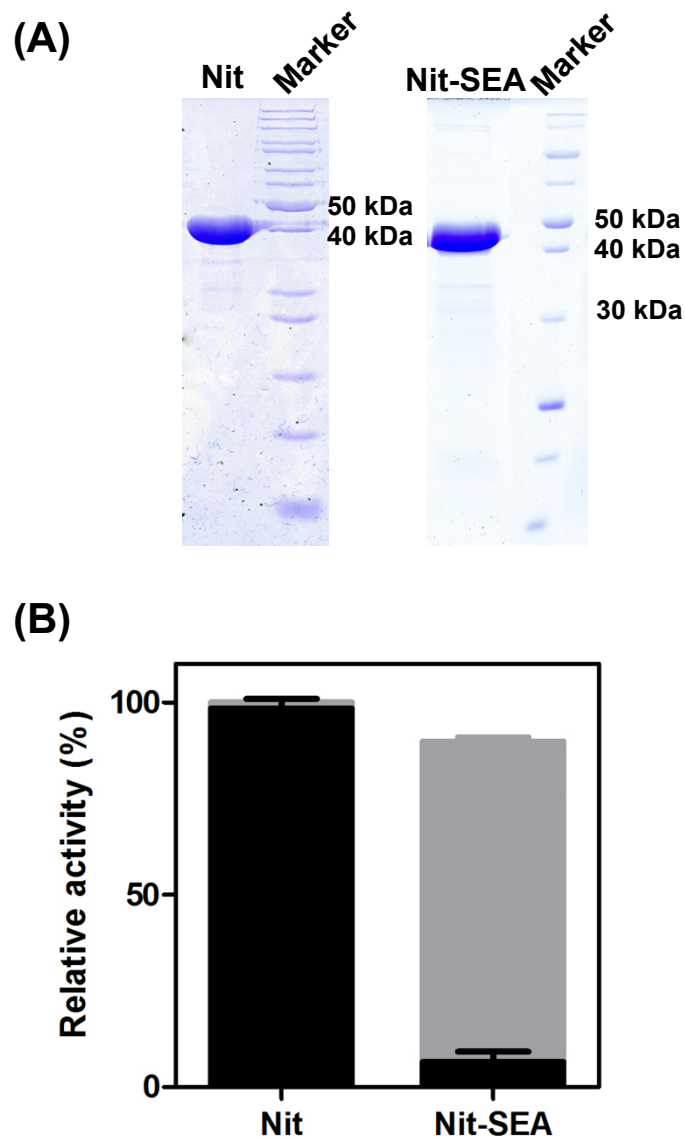

**Figure S2.** (A) SDS-PAGE analysis of the purified native nitrilase (Nit) and the purified fusion form (Nit-SEA). (B) Distributions of nitrilase activities in the supernatant (■) and precipitation (■) fractions of cell lysates. The activities calculated and normalized to the total activities of the native nitrilase. All enzymes were extracted from the same amount of cells ( $OD_{600}$ ) and performed in triplicate.

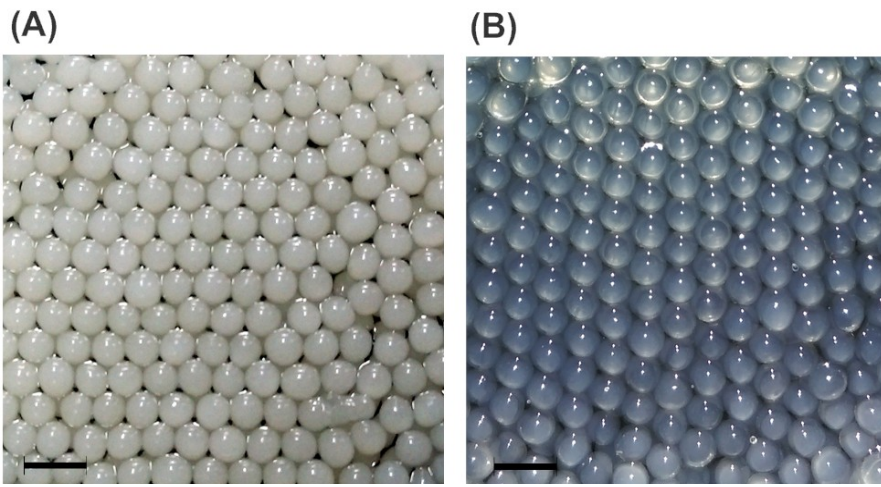

**Figure S3.** (A) Nit-iSEA particles and (B) Nit-i particles. Scale bars: 2 mm.
